# Supplementary material for: Avian Influenza Virus Infection Risk in Humans with Chronic Diseases
Source: PubMed Central journal article supplement (PMC4354171; doi:10.1038/srep08971), 2015-03-10
Supplement: srep08971-s1.pdf [file srep08971-s1.pdf]

## Supplementary information for

### **Avian Influenza Virus Infection Risk in Humans with Chronic Diseases**

Yaogang Zhong<sup>1†</sup>, Yannan Qin<sup>1†</sup>, Hanjie Yu<sup>1†</sup>, Jingmin Yu<sup>1</sup>, Haoxiang Wu<sup>1</sup>, Lin Chen<sup>1</sup>, Peixin Zhang<sup>1</sup>, Xiurong Wang<sup>2</sup>, Zhansheng Jia<sup>3</sup>, Yonghong Guo<sup>3</sup>, Hua Zhang<sup>4</sup>, Junjie Shan<sup>5</sup>, Yuxia Wang<sup>5</sup>, Hailong Xie<sup>6</sup>, Xiaojie Li<sup>6</sup>, Zheng Li<sup>1\*</sup>

<sup>1</sup>Laboratory for Functional Glycomics, College of Life Sciences, Northwest University, Xi'an, PR China.

<sup>2</sup>National Key Laboratory of Veterinary Biotechnology, Harbin Veterinary Research Institute, Chinese Academy of Agricultural Science, Harbin, PR China.

<sup>3</sup>Center of infectious diseases, Tangdu Hospital, Fourth Military Medical University, Xi'an, PR China.

<sup>4</sup>Department of Oncology, Shaanxi Provincial People's Hospital, Xi'an, PR China.

<sup>5</sup>Institute of Pharmacology and Toxicology, Academy of Military Medical Science, Beijing, PR China.

<sup>6</sup>Cancer Research Institute, University of South China, Hengyang, PR China.

†These authors contributed equally to this work.

\*Corresponding authors. E-mail: zhengli@nwu.edu.cn

This PDF file includes:

Supplementary Figure S1 to S2

Supplementary Table S1 to S3

**Supplementary Figures and Tables :**

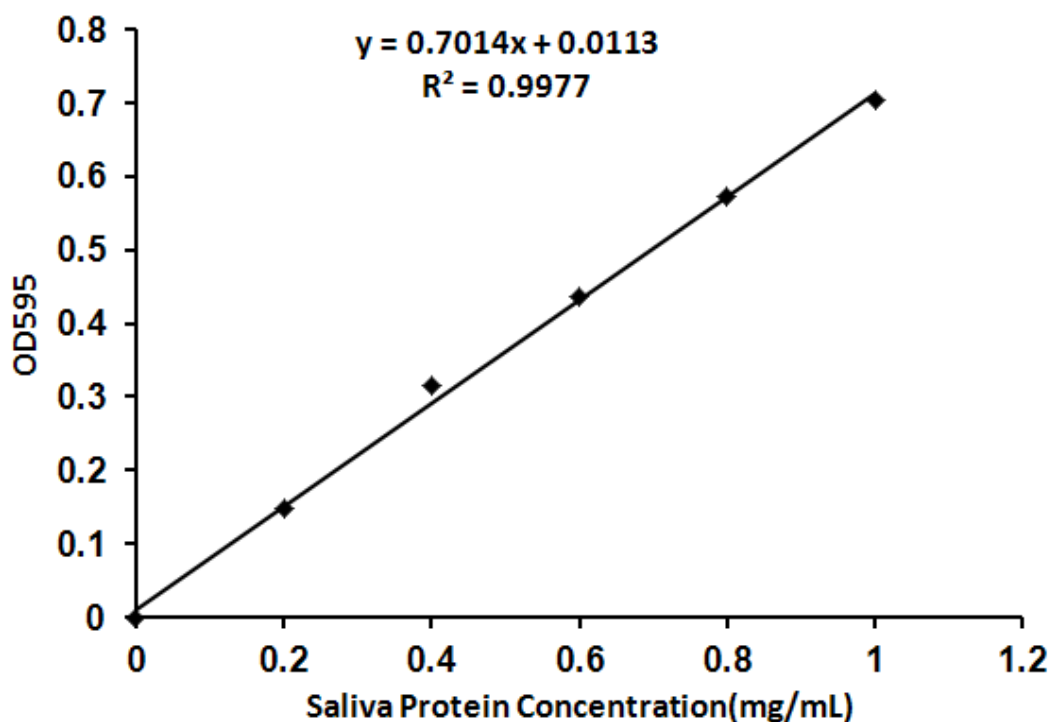

**Supplementary Figure S1.** (A) Whole Saliva Protein Concentration. The whole saliva protein concentrations of T2DM, HB, HC, HCC and GC patients as well as healthy groups were measured using the Bradford assay.

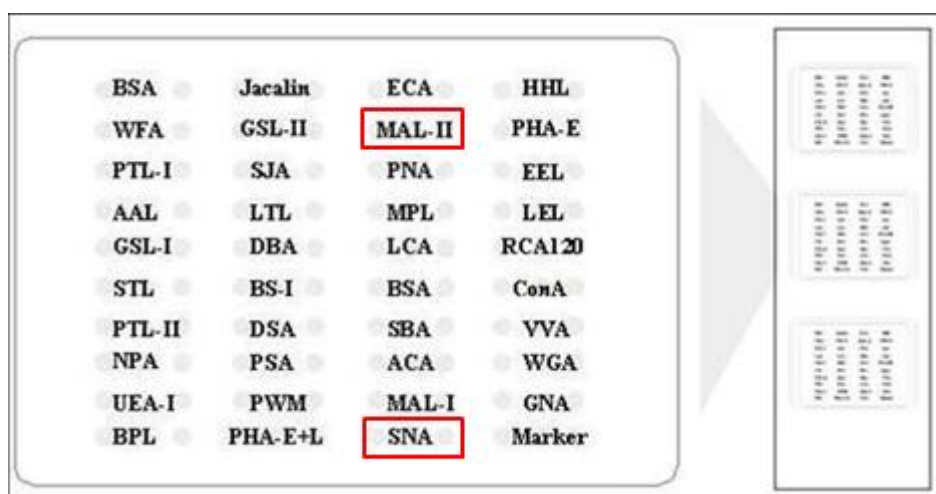

**Supplementary Figure S2.** The layout of Lectin microarray.

**Supplementary Table S1.** The clinical and demographic characteristics of T2DM patients and healthy groups.

| Parameter              |                                                                      | Healthy groups            | T2DM              | Bradford assay              |                   |             |        |
|------------------------|----------------------------------------------------------------------|---------------------------|-------------------|-----------------------------|-------------------|-------------|--------|
|                        |                                                                      |                           |                   | OD <sub>595</sub>           |                   | PC (mg/mL)  |        |
| Sample number(n)       |                                                                      | 60                        | 64                | H                           | D                 | H           | D      |
| Gender                 | male                                                                 | 50                        | 30                | 0.546                       | 0.596             | 0.752       | 0.834  |
|                        | female                                                               | 50                        | 34                | 0.523                       | 0.645             | 0.730       | 0.903  |
| Age, years, median, SD |                                                                      | 57±10.3                   | 57±11.3           |                             |                   |             |        |
| HbA1c(%)               | 4-6                                                                  | 60(100%)                  | —                 |                             |                   |             |        |
|                        | >9                                                                   | —                         | 28(43.8%)         |                             |                   |             |        |
|                        | >10                                                                  | —                         | 36(56.2%)         |                             |                   |             |        |
| OGTT(mmol/L)           | 0.5-1h                                                               | 7.8-9.0                   | Negative          | Positive                    |                   |             |        |
|                        | 2h                                                                   | <7.8                      |                   |                             |                   |             |        |
|                        | >3h                                                                  | 3.9-6.1                   |                   |                             |                   |             |        |
| FBG (mmol/L)           |                                                                      | 3.9-6.1                   | 6.8-11            |                             |                   |             |        |
| Lectin                 | specificity                                                          | Male, NFI±SD <sup>a</sup> |                   | Female, NFI±SD <sup>a</sup> |                   | Fold change |        |
|                        |                                                                      | MH                        | MD                | FH                          | FD                | MD/MH       | FD/FH  |
| SNA                    | Siaα2-6Gal/GalNAc                                                    | 0.0140<br>±0.0030         | 0.0200<br>±0.0041 | 0.0131<br>±0.0010           | 0.0232<br>±0.0070 | 1.43*       | 1.77** |
| MAL-II                 | Siaα2-3Galβ1-4Glc(NAc)/Glc,<br>Siaα2-3Gal, Siaα2-3,<br>Siaα2-3GalNAc | 0.0141<br>±0.0040         | 0.0041<br>±0.0090 | 0.0120<br>±0.0010           | 0.0071<br>±0.0042 | 0.291***    | 0.592* |

H: healthy groups, D: T2DM patients, MH: male healthy groups, FH: female healthy groups, MD: male T2DM patients, FD: female T2DM patients, a: Normalized fluorescent intensities (NFI) obtained for 9 repeated blocks in three repeated slides were averaged and its SD was counted. PC: Protein Concentration, \* $P<0.05$ , \*\* $P<0.01$ , \*\*\* $P<0.001$

**Supplementary Table S2.** The clinical and demographic characteristics of HB, HC, and HCC patients and healthy groups.

| Parameter                      |                                                                             | Healthy groups      | HB                  | HC                 | HCC                | Fold change        |                      |                    |
|--------------------------------|-----------------------------------------------------------------------------|---------------------|---------------------|--------------------|--------------------|--------------------|----------------------|--------------------|
| Sample number (n) /male        |                                                                             | 33                  | 36                  | 37                 | 32                 | HB/H               | HC/H                 | HCC/H              |
| Age, years, median, SD         |                                                                             | 65±7.2              | 62±9.5              | 61±11.7            | 65±7.6             |                    |                      |                    |
| Bradford assay                 | OD <sub>595</sub>                                                           | 0.549               | 0.676               | 0.658              | 0.698              |                    |                      |                    |
|                                | PC(mg/mL)                                                                   | 0.767               | 0.945               | 0.922              | 0.979              |                    |                      |                    |
| Log (HBV DNA)<br>(copies/mL)   |                                                                             | —                   | 6.84<br>±2.02       | 5.17<br>±3.77      | 4.21<br>±1.18      |                    |                      |                    |
| ALT(IU/mL), median,<br>(range) |                                                                             | 0-40                | 110<br>(10.3-58.8)  | 30.3<br>(27.4-157) | 23.2<br>(33.0-127) |                    |                      |                    |
| AST(IU/mL), median,<br>(range) |                                                                             | 0-40                | 73.5<br>(14.1-64.4) | 55.6<br>(18.3-126) | 52.4<br>(24.1-254) |                    |                      |                    |
| AFP(µg/L), median,<br>(range)  |                                                                             | 0-25                | 36.1<br>(7.50-29.8) | 89.5<br>(27.6-104) | 584<br>(17.0-271)  |                    |                      |                    |
| Lectin                         | specificity                                                                 | NFI±SD <sup>a</sup> |                     |                    |                    |                    |                      |                    |
| SNA                            | Siaα2-6Gal/Gal<br>NAc                                                       | 0.0139<br>±0.0090   | 0.0318<br>±0.0011   | 0.0196<br>±0.0003  | 0.0185<br>±0.0020  | 2.29 <sup>**</sup> | 1.41 <sup>**</sup>   | 1.33 <sup>*</sup>  |
| MAL-II                         | Siaα2-3Galβ1-4<br>Glc(NAc)/Glc,<br>Siaα2-3Gal,<br>Siaα2-3,<br>Siaα2-3GalNAc | 0.0089<br>±0.0005   | 0.0038<br>±0.0008   | 0.0039<br>±0.0007  | 0.0043<br>±0.0040  | 0.427 <sup>*</sup> | 0.438 <sup>***</sup> | 0.483 <sup>*</sup> |

HB: Hepatitis B patients, HC: Hepatic cirrhosis patients, HCC: Hepatocellular carcinoma patients,  
a: Normalized fluorescent intensities (NFI) obtained for 9 repeated blocks in three repeated slides were averaged and its SD was counted, PC: Protein Concentration, \**P*<0.05, \*\**P*<0.01, \*\*\**P*<0.001

**Supplementary Table S3.** The clinical and demographic characteristics of GC patients and healthy groups.

| Parameter              |                                                                         | Healthy groups      | GC                | Bradford assay    |                   |             |         |
|------------------------|-------------------------------------------------------------------------|---------------------|-------------------|-------------------|-------------------|-------------|---------|
|                        |                                                                         |                     |                   | OD <sub>595</sub> |                   | PC (mg/mL)  |         |
| Sample number(n)       |                                                                         | 64                  | 70                | H                 | G                 | H           | G       |
| Gender                 | male                                                                    | 30                  | 30                | 0.493             | 0.620             | 0.687       | 0.868   |
|                        | female                                                                  | 34                  | 40                | 0.528             | 0.646             | 0.737       | 0.905   |
| Age, years, median, SD |                                                                         | 57±11.6             | 57±11.3           |                   |                   |             |         |
| Tumor size (cm)        | <2                                                                      | —                   | 18(25.0%)         |                   |                   |             |         |
|                        | 2-5                                                                     |                     | 29(41.7%)         |                   |                   |             |         |
|                        | >5                                                                      |                     | 23(33.3%)         |                   |                   |             |         |
| TMN classification     | I, II                                                                   | —                   | 27(38.9%)         |                   |                   |             |         |
|                        | III, IV                                                                 |                     | 43(61.1%)         |                   |                   |             |         |
| Microvascular invasion | NO                                                                      | —                   | 49(69.4%)         |                   |                   |             |         |
|                        | Yes                                                                     |                     | 21(30.6%)         |                   |                   |             |         |
| Histology              | Well                                                                    | —                   | 19(27.8%)         |                   |                   |             |         |
|                        | Moderate                                                                | —                   | 45(63.9%)         |                   |                   |             |         |
|                        | Poor                                                                    | —                   | 6(8.3%)           |                   |                   |             |         |
| Lectin specificity     |                                                                         | NFI±SD <sup>a</sup> |                   |                   |                   | Fold change |         |
|                        |                                                                         | MH                  | MG                | FH                | FG                | MG/MH       | FG/FH   |
| SNA                    | Siaα2-6Gal/GalNAc                                                       | 0.0415<br>±0.0008   | 0.0325<br>±0.0020 | 0.0370<br>±0.0091 | 0.0400<br>±0.0020 | 0.783*      | 1.08*** |
| MAL-II                 | Siaα2-3Galβ1-4Glc(NAc)/Glc,<br>Siaα2-3Gal,<br>Siaα2-3,<br>Siaα2-3GalNAc | 0.0345<br>±0.0031   | 0.0256<br>±0.0042 | 0.0320<br>±0.0051 | 0.0288<br>±0.0031 | 0.742**     | 0.900*  |

MH: male healthy groups, FH: female healthy groups, MG: male GC patients, FG: female GC patients, a: Normalized fluorescent intensities (NFI) obtained for 9 repeated blocks in three repeated slides were averaged and its SD was counted, PC: Protein Concentration, \* $P<0.05$ , \*\* $P<0.01$ , \*\*\* $P<0.001$
